# Supplementary material
Source: ML conference proceedings conference paper supplement (https://openaccess.thecvf.com/content/cvpr_2015/html/Mottaghi_A_Coarse-to-Fine_Model_2015_CVPR_paper.html)
Supplement: Supplementary file 1 [file Mottaghi_A_Coarse-to-Fine_Model_2015_CVPR_supplemental.pdf]

# A Coarse-to-Fine Model for 3D Pose Estimation and Sub-category Recognition –Supplementary Material–

Roozbeh Mottaghi<sup>1</sup>, Yu Xiang<sup>2,3</sup>, and Silvio Savarese<sup>3</sup>

<sup>1</sup>Allen Institute for AI, <sup>2</sup>University of Michigan-Ann Arbor, <sup>3</sup>Stanford University

We provide per-category results in Tables 1 and 2. These tables correspond to Tables 1 and 2 in the paper, respectively.

|                | Bounding Box | All  | Sub-category & Viewpoint | Sub-category | Viewpoint (8 views) |
|----------------|--------------|------|--------------------------|--------------|---------------------|
| RCNN [2]       |              |      |                          |              |                     |
| aeroplane      | 69.1         | ✗    | ✗                        | ✗            | ✗                   |
| boat           | 29.3         | ✗    | ✗                        | ✗            | ✗                   |
| car            | 55.8         | ✗    | ✗                        | ✗            | ✗                   |
| DPM-VOC+VP [3] |              |      |                          |              |                     |
| aeroplane      | 40.5         | ✗    | ✗                        | ✗            | 28.6                |
| boat           | 0.5          | ✗    | ✗                        | ✗            | 0.2                 |
| car            | 47.6         | ✗    | ✗                        | ✗            | 36.6                |
| V-DPM [1]      |              |      |                          |              |                     |
| aeroplane      | 39.8         | ✗    | ✗                        | ✗            | 23.8                |
| boat           | 5.8          | ✗    | ✗                        | ✗            | 1.0                 |
| car            | 37.3         | ✗    | ✗                        | ✗            | 23.8                |
| SV-DPM [1]     |              |      |                          |              |                     |
| aeroplane      | 41.8         | ✗    | 14.0                     | 24.1         | 26.9                |
| boat           | 6.7          | ✗    | 4.4                      | 6.1          | 4.7                 |
| car            | 34.9         | ✗    | 6.7                      | 11.2         | 23.0                |
| FSV-DPM [1]    |              |      |                          |              |                     |
| aeroplane      | 40.0         | 0.12 | 16.2                     | 25.8         | 25.7                |
| boat           | 5.4          | 0.51 | 3.1                      | 4.7          | 3.2                 |
| car            | 32.0         | 0.43 | 4.5                      | 7.6          | 19.5                |

Table 1. Results of variation of DPM [1], DPM-VOC+VP [3] and RCNN [2] on PASCAL3D+ [4] for all three or a subset of tasks. The result of DPM-VOC+VP [3] was adopted from [4]. The first column (‘Bounding Box’) is equivalent to the standard detection AP of PASCAL VOC. The meaning of ✗ is that the method is not capable of doing that task.

|                          | Bounding Box      | All | Sub-category & Viewpoint | Sub-category | Viewpoint (8 views) |
|--------------------------|-------------------|-----|--------------------------|--------------|---------------------|
| 1-layer hierarchy (ours) |                   |     |                          |              |                     |
| aeroplane                | 69.1              | ✗   | ✗                        | ✗            | 40.5                |
| boat                     | 26.3              | ✗   | ✗                        | ✗            | 9.8                 |
| car                      | 53.0              | ✗   | ✗                        | ✗            | 36.4                |
| 2-layer hierarchy (ours) |                   |     |                          |              |                     |
| aeroplane                | 69.2              | ✗   | 28.6                     | 45.0         | 41.3                |
| boat                     | 29.5              | ✗   | 8.4                      | 21.3         | 9.6                 |
| car                      | 54.4              | ✗   | 11.1                     | 16.1         | 37.7                |
| 3-layer hierarchy (ours) |                   |     |                          |              |                     |
| aeroplane                | 69.2              | 4.0 | 28.7                     | 46.7         | 40.8                |
| boat                     | 29.5              | 4.0 | 8.8                      | 21.9         | 10.6                |
| car                      | 56.1              | 1.6 | 15.4                     | 23.2         | 37.2                |
| Flat model               |                   |     |                          |              |                     |
| aeroplane                | 69.2 <sup>†</sup> | 3.0 | 25.6                     | 42.0         | 38.3                |
| boat                     | 29.5              | 3.1 | 7.4                      | 22.8         | 10.6                |
| car                      | 56.1              | 1.2 | 11.3                     | 18.2         | 29.6                |
| Separate                 |                   |     |                          |              |                     |
| aeroplane                | 69.2 <sup>†</sup> | 1.4 | 27.0                     | 47.6         | 39.2                |
| boat                     | 29.5              | 2.9 | 8.6                      | 24.8         | 10.1                |
| car                      | 56.1              | 1.5 | 12.8                     | 20.6         | 36.7                |

Table 2. Results of variations our hierarchical model, a flat model that uses the same set of features as those of the 3-layer hierarchy, and also separate classifiers on PASCAL3D+[4]. <sup>†</sup> We consider the same confidence values as the 3-layer model. So the bounding box detection results are identical.

## Sub-category information:

We considered the following sub-categories in our experiments:

- **Aeroplane:** Airline, Fighter, Propeller, Shuttle
- **Boat:** Cabin, Cruise, Rowing, Sailing
- **Car:** Hatchback, Mini, Minivan, Race, Sedan, SUV, Truck, Wagon

## Confusion matrices for sub-category recognition:

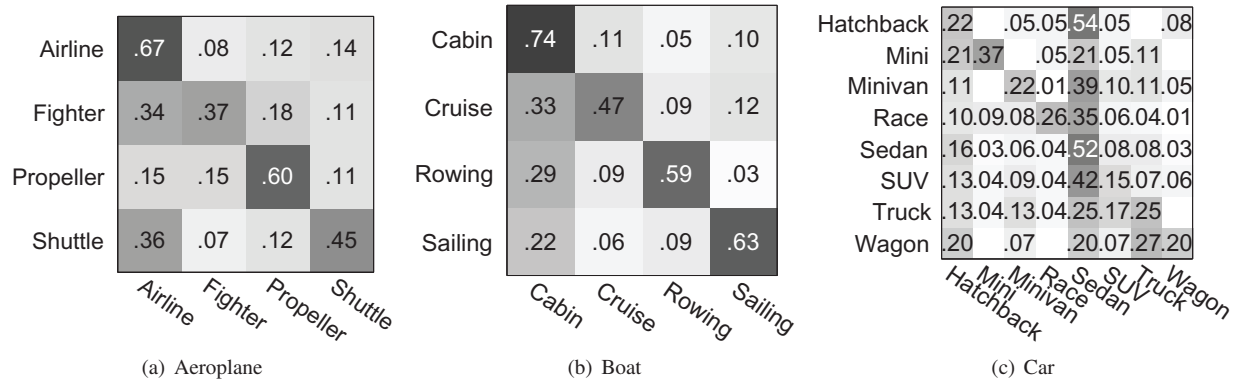

Figure 1. Confusion matrices for sub-category recognition. The recall rate is 81.7, 66.0, and 71.1% for *aeroplane*, *boat*, and *car*, respectively.

## References

- [1] P. Felzenszwalb, R. Girshick, D. McAllester, and D. Ramanan. Object detection with discriminatively trained part based models. *PAMI*, 2010.
- [2] R. Girshick, J. Donahue, T. Darrell, and J. Malik. Rich feature hierarchies for accurate object detection and semantic segmentation. In *CVPR*, 2014.
- [3] B. Pepik, M. Stark, P. Gehler, and B. Schiele. Teaching 3d geometry to deformable part models. In *CVPR*, 2012.
- [4] Y. Xiang, R. Mottaghi, and S. Savarese. Beyond pascal: A benchmark for 3d object detection in the wild. In *WACV*, 2014.
